# Supplementary material for: Post-transcriptional regulation of fruit ripening and disease resistance in tomato by the vacuolar protease SlVPE3
Source: PubMed Central journal article supplement (PMC5341188; doi:10.1186/s13059-017-1178-2), 2017-03-07
Supplement: 13059_2017_1178_MOESM4_ESM.pdf [file 13059_2017_1178_MOESM4_ESM.pdf]

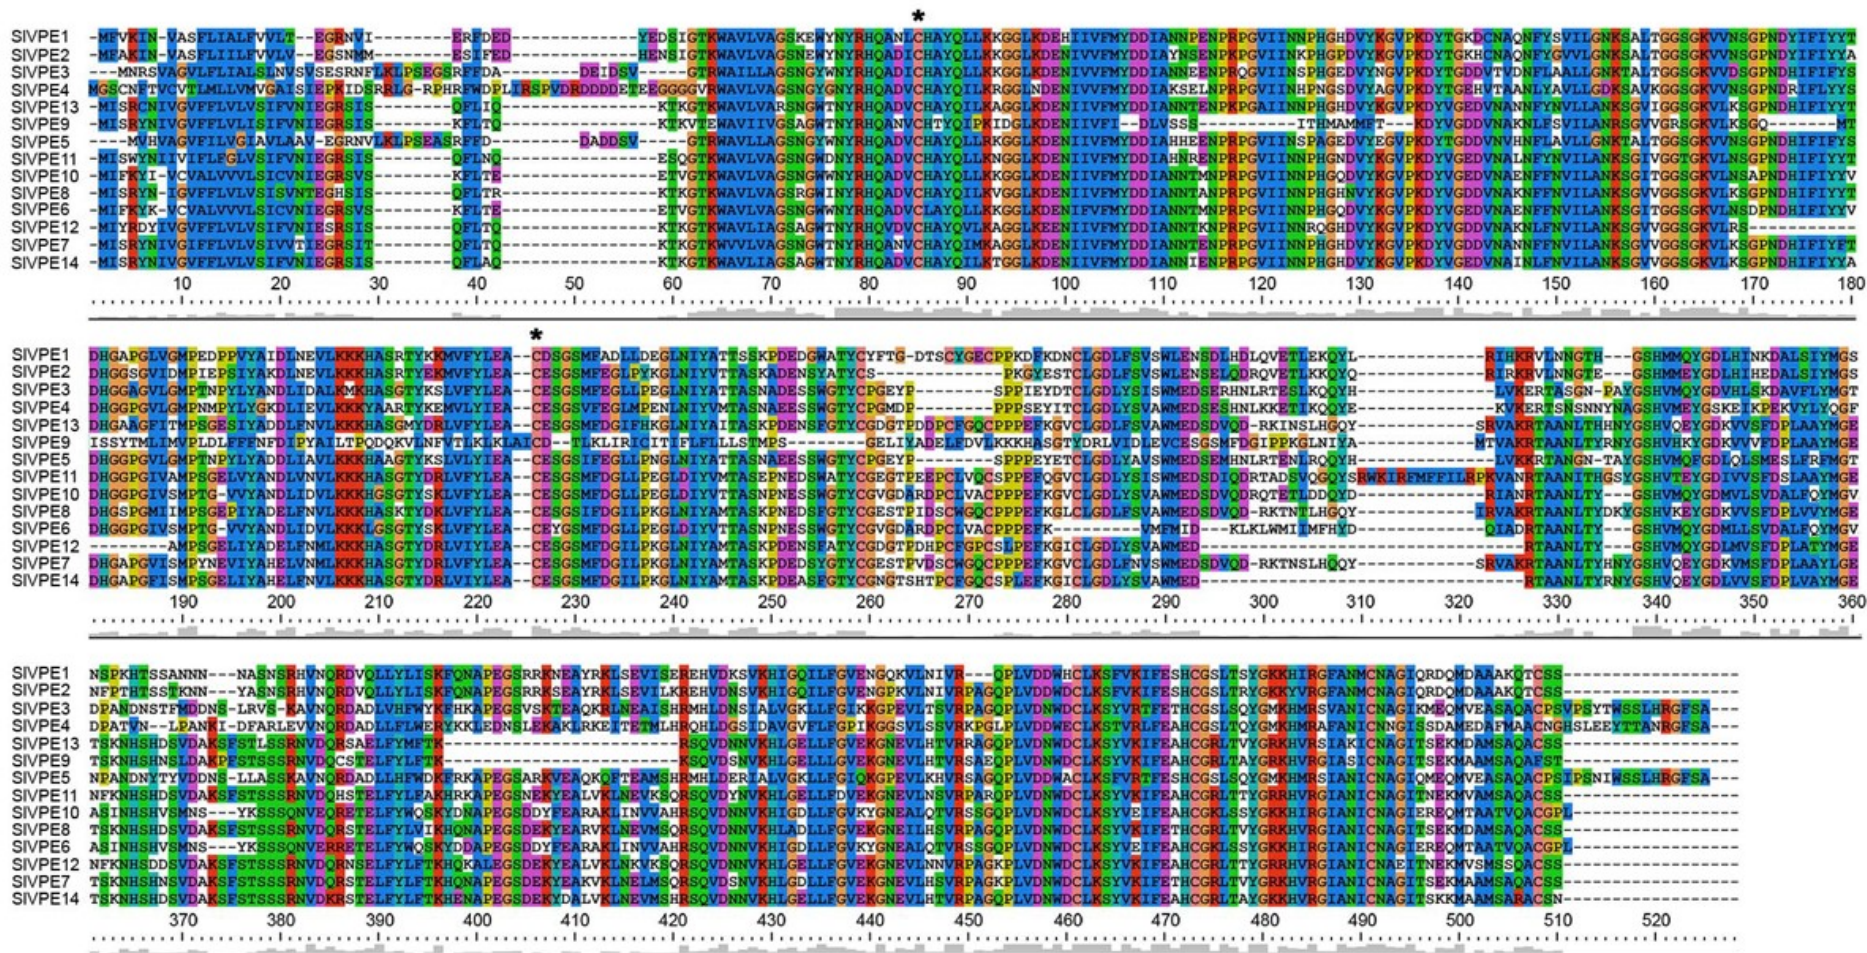

**Additional file 4: Figure S1.** Protein sequence alignment of tomato vacuolar processing enzymes (VPEs) using Clustal X. The amino acid sequences of all tomato VPEs were used to generate the alignment. Asterisks indicate conserved cysteine residues in the active-sites.



(a)

| Number | Locus          | Description                                         |
|--------|----------------|-----------------------------------------------------|
| 1      | Solyc01g007850 | Pentatricopeptide repeat-containing protein         |
| 2      | Solyc01g099000 | Pentatricopeptide repeat-containing protein         |
| 3      | Solyc01g103620 | Sodium bile acid symporter family protein expressed |
| 4      | Solyc01g106230 | B3 domain-containing protein At5g60142              |
| 5      | Solyc02g069490 | FAD linked oxidase domain protein                   |
| 6      | Solyc03g071560 | RNA recognition motif, glycine rich protein         |
| 7      | Solyc03g077890 | Unknown protein                                     |
| 8      | Solyc03g082990 | Tetratricopeptide repeat containing protein         |
| 9      | Solyc04g056630 | CBS domain containing protein-like                  |
| 10     | Solyc06g005670 | mRNA binding protein Pumilio 2                      |
| 11     | Solyc07g049550 | 1-aminocyclopropane-1-carboxylate oxidase           |
| 12     | Solyc08g079050 | Unknown Protein (AHRD V1)                           |
| 13     | Solyc08g082900 | WD-40 repeat family protein                         |
| 14     | Solyc09g065010 | mRNA-capping enzyme subunit alpha                   |
| 15     | Solyc10g081920 | Coatomer subunit beta-1                             |
| 16     | Solyc12g089240 | Zinc finger protein CONSTANS-LIKE 3                 |

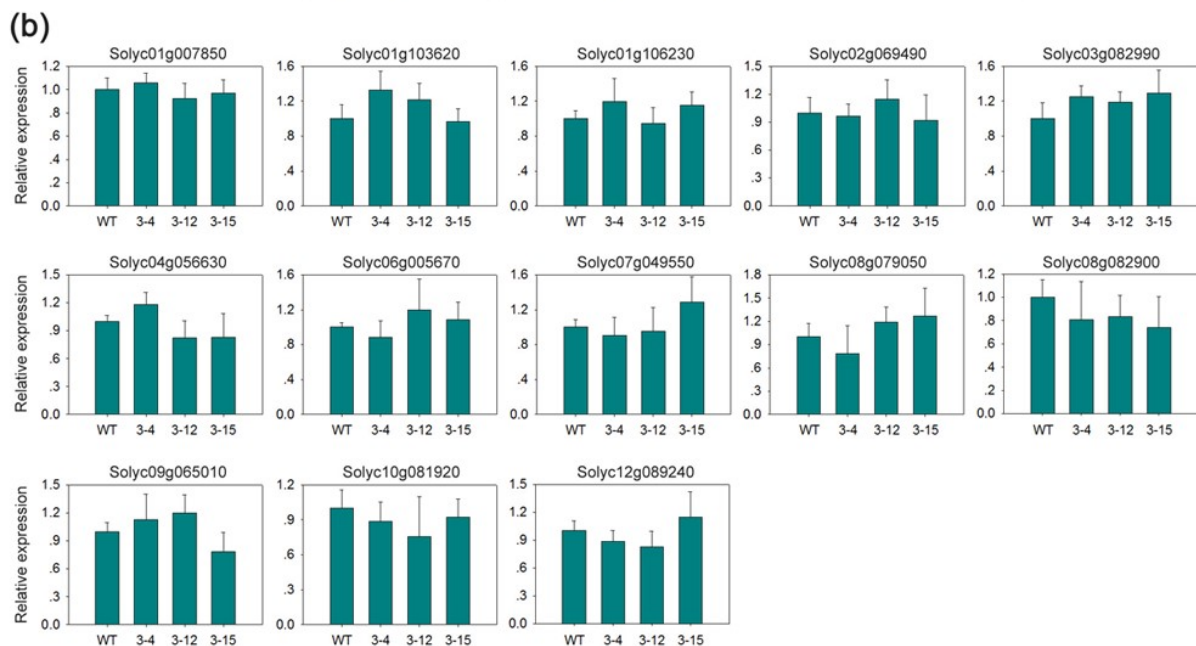

**Additional file 4: Figure S2.** Prediction of the potential off-targets of the RNAi construct. (a) The potential off-targets were predicted using the web-based computational tools pssRNAit [37]. The gene identifiers (Solyc numbers) and functional annotations are shown. (b) Expression analysis of the potential off-targets in leaves of wild-type (WT) and *SIVPE3* RNAi lines (3-4, 3-12, and 3-15) as determined by quantitative RT-PCR. The gene transcript levels are normalized against the *ACTIN* gene, followed by normalization against the WT expression. Values are means  $\pm$  SD of three independent experiments. Transcripts corresponding to three genes (Solyc01g099000, Solyc03g071560, and Solyc03g077890) were not detected.

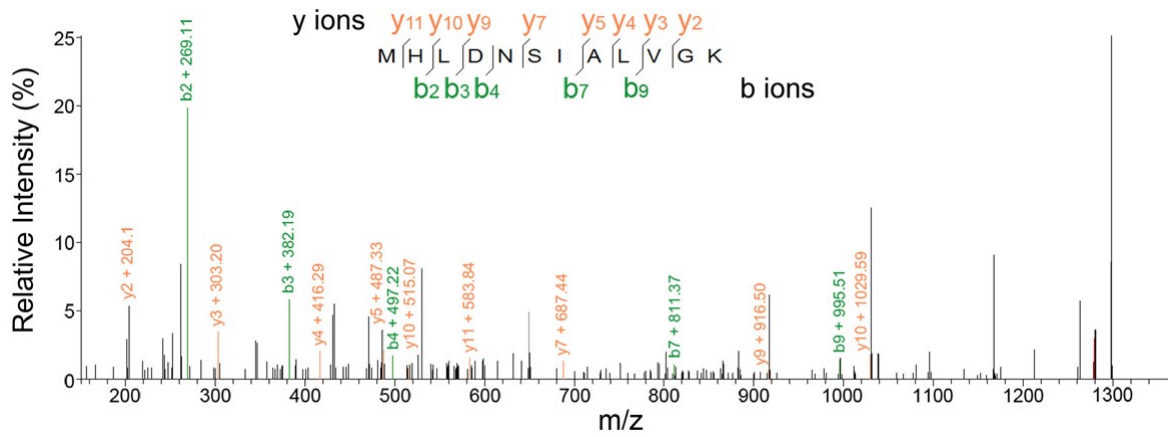

**Additional file 4: Figure S3.** Identification of SIVPE3 by mass spectrometry. Representative tandem mass spectra of peptide(s) identified from SIVPE3 are displayed. Sequences of identified peptides are shown above the mass spectra with b-ions and y-ions indicated.

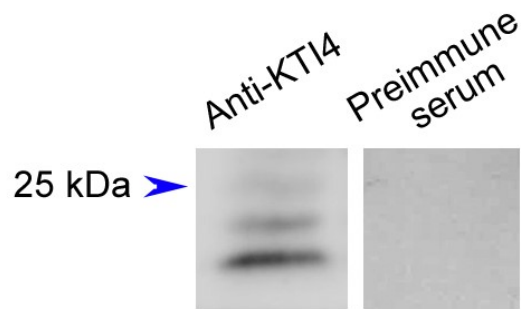

**Additional file 4: Figure S4.** Determination of KTI4 antibody specificity. Immunoblot analysis was performed using affinity-purified KTI4 antibody and preimmune serum. The predicted molecular mass of the full-length KTI4 protein appeared to be 25-kDa, indicated by a blue arrowhead.

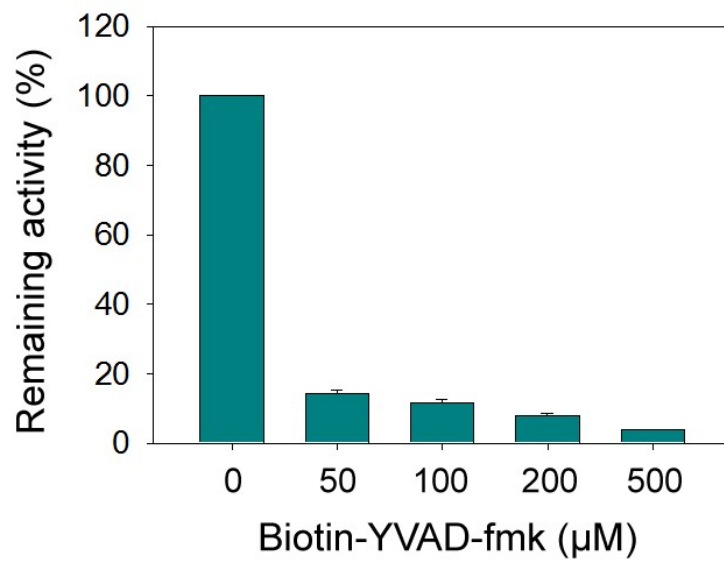

**Additional file 4: Figure S5.** Effects of biotin-YVAD-fmk on vacuolar processing enzyme (VPE) activity in tobacco (*N. benthamiana*) leaves transiently expressing *SIVPE3*. VPE activity was measured using a synthesized fluorescent substrate. Values are means  $\pm$  SD of three independent experiments.

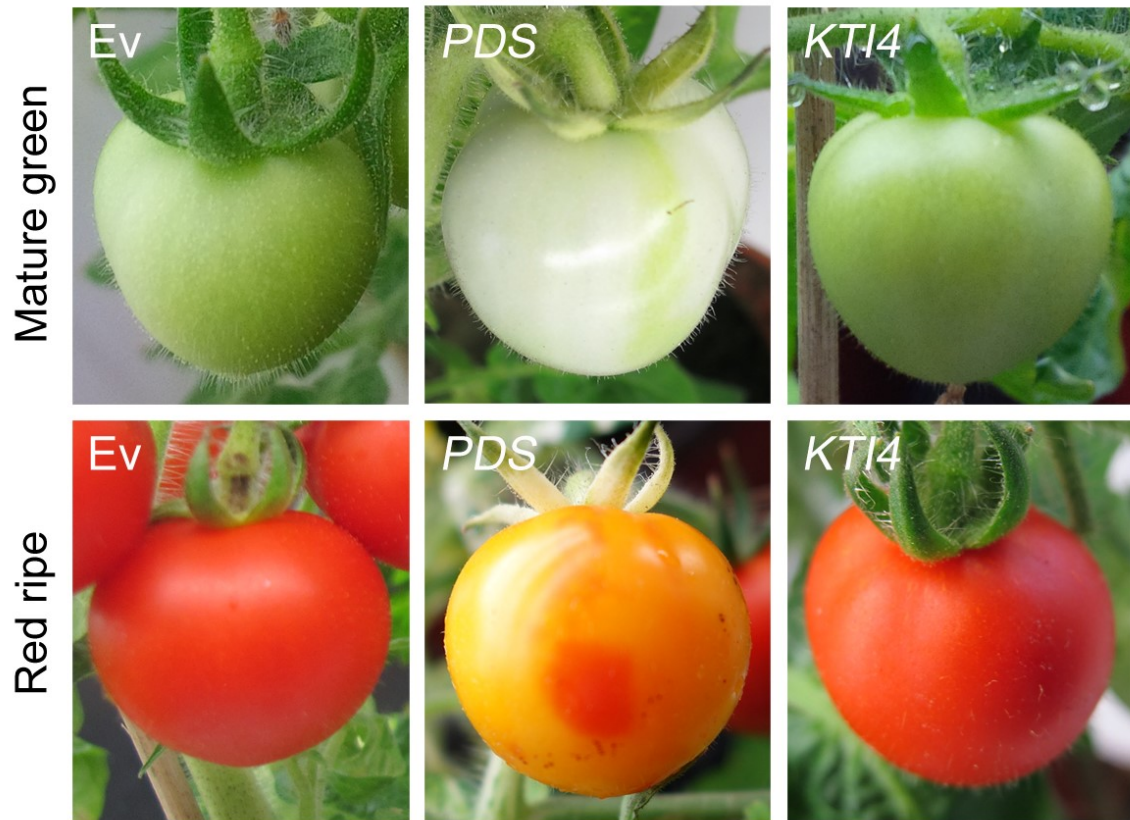

**Additional file 4: Figure S6.** Virus-induced gene silencing (VIGS) of *KT14* in tomato has no effect on fruit ripening. Images show the fruit of plants infected with vectors containing no insert (Ev), specific *PHYTOENE DESATURASE* sequence (*PDS*), or specific *KT14* sequence. Mature green stage fruit (upper panel) and red ripe stage fruit (lower panel) are shown.

**Additional file 4: Supplementary text.** Protein sequences of tomato vacuolar processing enzymes (VPEs).

**>SIVPE1**

MFVKINVASFLIALFVVLTEGRNVIERFDEDYEDSIGTKWAVLVAGSKEWYNYRHQANLCHAYQLL  
KKGGLKDEHIIVFMYDDIANNPENPRPGVIINNPFGHDVYKGVPKDYTGKDCNAQNFYSVILGNK  
SALTGGSGKVVNSGPNDYIFIIYTDHGAPGLVGMPEPPVYAIDLNEVLKKKHASRTYKKMVFYL  
EACDSGSMFADLLDEGLNIYATTSSKPEDDGWATYCYFTGDTSCYGECPPKDFKDNCLGDLFSV  
SWLENSDLHDLQVETLEKQYLRIHKRVLNNGTHGSHMMQYGDHLINKDALSIYMGSNSPKHTSS  
ANNNNASNSRVNQRDVQLLYLISKFQNAPEGSRRKNEAYRKLSEVISEREHVDKSVKHIGQILF  
GVENGQKVLNIVRQPLVDDWHCLKSFVKIFESHCGSLTSYGKKHIRGFANMCNAGIQRDQMDAA  
AKQTCSS

**>SIVPE2**

MFAKINVASFLIILFVVLVEGSNMMESIFEDHENSIGTKWAVLVAGSNEWYNYRHQADICHAYQLL  
KKGGLKDENVVFMYYDDIAYNSENPKPGVIINKPHGPDVYKGVPKDYTGKHCNAQNFYGVVLGN  
KSALTGGSGKVVNSGPNDYIFIIYADHGGSGVIDMPIEPSYAKDLNEVLKKKHASRTYEKMVFYL  
EACESGSMFEGLPYKGLNIYVTTASKADENSYATYCSPKGYESTCLGDLFSVSWLENSELQDRQ  
VETLKKQYQRIRKRVLNNGTEGSHMMEYGDHLIHEDALSIYMGSNFPTHTSSTKNNYASNSRVH  
NQRDVQLLYLISKFQNAPEGSRRKSEAYRKLSEVILKREHVDNSVKHIGQILFGVENGPKVLNIVR  
PAGQPLVDDWDCLKSFVKIFESHCGSLTRYGKKYVRGFANMCNAGIQRDQMDAAAKQTCSS

**>SIVPE3**

MNRSVAGVFLIALSLNVSVSESRNFLKLPSEGSRRFFDADEIDSVGTRWAILLAGSNGYWNYRH  
QADICHAYQLLKKGGLKDENVVFMYYDDIANNEENPRQGVIIINSPHGEDVYNGVPKDYTGDDVT  
VDNFLAALLGNKTALTGGSGKVVDSGPNDHIFIFYSDHGGAGVLGMPTNPYLYANDLIDALKMKH  
ASGTYSKSLVFYLEACESGSMFEGLLPEGLNIYATTASNADESSWGTYCPGEYSPPIEYDTCLGD  
LYSISWMEDSERHNLRTESLKQQYHLVKERTASGNPAYGSHVMQYGDVHLSKDAVFLYMGTD  
ANDNSTFMDDNSLRVSKAVNQRDADLVHFWYKFHKAPEGSVSKTEAQKRLNEAISHRMHLDNS  
IALVGKLLFGIKKGPEVLTSVRPAGQPLVDNWDCLKSYVRTFETHCGSLSQYGMKHMRSVANICN  
AGIKMEQMVEASAQACPSVPSYTWSSSLHRGFA

**>SIVPE4**

MGSCNFTVCVTLMLLMVGAISIEPKIDSRRLGRPHRFWDPLIRSPVDRDDDDETEEGGGGVR  
WAVLVAGSNGYGNRYRHQADVCHAYQILKRGLNDENVVFMYYDDIAKSELNPRPGVIINHPNGS  
DVYAGVPKDYTGHEVTAANLYAVLLGDKSAVKGGSGKVVNSGPNDRIFLYSDHGGPGVLGMP  
NMPYLYGKDLIEVLKKKYAARTYKEMVLYIEACESGSVFEGLMPENLNIYVMTASNAEESSWGTY  
CPGMDPPPPSEYITCLGDLYSAWMESESHNLKKETIKQQYEKVKERTSNSNNYNAGSHVME  
YGSKEIKPEKVYLYQGFDPATVNL PANKIDFARLEVVNQRDADLLFLWERYKKLEDNSLEKAKLR  
KEITETMLHRQHLDGSIDAVGVFLFGPIKGGSVLSSVRKPLPLVDDWECLKSTVRLFEAHCGSL  
TQYGMKHMRAFANICNNGISSDAMEDAFMAACNGHSLEEYTTANRGFA

**>SIVPE5**

MVHVAGVFIIVGIAVLAAVEGRNVLKLKLPSEASRRFFDADDSVGTRWAVLLAGSNGYWNYRHQAD

VCHAYQLLRKGGGLKDENIIVFMYDDIAHHEENPRPGVIINSPAGEDVYEGVPKDYTGDDVNVHNF  
LAVLLGNKTALTGGSGKVVNSGPNDHIFIFYS DHGGPGVLGMPTNPYLYADDLIAVLKKKHAAGT  
YKSLVLYIEACESGSIFEGLLPGLNIYATTASNAEESWGTYCPGEYSPPEYETCLGDLYAVS  
WMEDSEMHLRTEENLRQQYHLVKKRTANGNTAYGSHVMQFGDLQLSMESLFRFMGTNPANDN  
YTYVDDNSLLASSKAVNQRDADLLHFWDKFRKAPEGSARKVEAQKQFTEAMSHRMHLDERIAL  
VGKLLFGIQKGPEVLKHVRSAGQPLVDDWACLKSFVRTFESHCGSLSQYGMKHMRSIANICNAG  
IQMEQMVEASQAQCPSPISNIWSSLHRGFSA

**>SIVPE6**

MIFKYKVCVALVVLSICVNIENGRSVSKFLTEETVGTKWAVLVAGSNGWWNYRHQADVCLAYQLL  
KKGGLKDENIFVFMYYDDIANNTMNPRPGVIINPHGQDVYKGVPKDYVGEDVNAENFFNVILAN  
KSGITGGSGKVLNSDPNDHIFIYYVDHGGPGIVSMPTGVVYANDLIDVLKKKLGSGTYSKLVFYLE  
ACEYGS MFDGLLPEGLDIYVTTASNPNESWGTYCGVGDARDPCLVACPPPEFKVMFMIDKLL  
WMIIMFHYDQIADR TANLTYGSHVMQYGDMLLSVDALFQYMGVASINHSHVSMNSYKSSSQN  
VERRETELFYWQSKYDDAPEGSDDYFEARAKLINVVAHRSQVDN NVKHIGDLLFGVKY GNEAL  
QTVRSSGQPLVDNWDCLKSYVEIFEAHCGKLSY GKKHIRGIANICNAGIEREQMTAATVQACGP  
L

**>SIVPE7**

MISRYNIVGIFFLVLSIVVTIEGRSITQFLTQKTKGTKWVVLVAGSNGWTNYRHQANVCHAYQIM  
KAGGLKDENIIVFMYDDIANNTENPRPGVIINPHGHVDYKGVPKDYVGDV NANNFFNVILANK  
SGVVGSGKVLKSGPNDHIFIYFTDHGAPGVISMPYNEVIYAHELVNMLKKKHASGTYDRLV FYL  
EACESGSMFDGILPKGLNIYAMTASKPDEDSYGT YCGESTPVDSCWGQCPPPEFKGVCLGDLF  
NVSWMEDSDVQDRKTNSLHQYSRVAKRTAANLTYHNYGSHVQEYGDKVMSFDPLAAYLGET  
SKNHSNSVDAKS FSTSSSRNVDQRSTELFYLF TKHQNAPEGSDEKYEAKVKNELMSQRSQV  
DSNVKHLGDLLFGVEKGNEVLHSVRPAGKPLVDNWDCLKSYVKIFETHCGRLTVYGRKHVRGIA  
NICNAGITSEKMAAMSAQACSS

**>SIVPE8**

MISRYNIVGVFFLVLSISVNTEGHSISQFLTRKTKGTKWAVLVAGSRGWINYRHQADVCHAYQILK  
VGGLKDENIIVFMYDDIANNTANPRPGVIINPHGHNVYKGVPKDYVGDVNAKNFFNVILANKS  
GVVVGSGKVLKSGPNDHIFIYYTDHGSPGMIIMP SGEPYADELFNVLKKKHASKTYDKLVFYLEA  
CESGSIFDGILPKGLNIYAMTASKPNEDSFGT YCGESTPIDSCWGQCPPPEFKGLCLGDLF SVAW  
MEDSDVQDRKTNTLHGQYIRVAKRTAANLTYDKY GSHVKEYGDKVVSFDPLVVYMGGETSKNHS  
HDSVDAKS FSTSSSRNVDQRSTELFYLV IKHQNAPEGSDEKYE ARVKLNEVMSQRSQVDN NVK  
HLADLLFGVEKGNEILHSVRPAGQPLVDNWDCLKSYVKIFETHCGRLTVYGRKHVRGIANICNAG  
ITSEKMDAMSAQACSS

**>SIVPE9**

MISRYNIVGVFFLVLSIFVNIENGRSISKFLTQKTKVTEWAVIIVGSAGWTNYRHQANVCHTYQIPKI  
DGLKDENIIVFIDLVSSTHMMAMMFTKDYVGDV NAKNLF SVILANRSGVVGSRGKVLKSGQMTI  
SSYTMLIMVPLDLFFFNFDPYAILTPQDQKVLNFVTLK LKLAICDTLKLIRICITIFL FLLLSTMPSGE  
LIYADELFDVLKKKHASGTYDRLVIDLEVCESGSMFDGIPPKGLNIYAMTVAKRTAANLTYRNYGS  
HVHKYGDKVVFDPLAAYMGGETSKNHSNSLDAKPFSTSSSRNVDQCSTELFYLF TKKSQVDS



NVKHLGELLGVEKGNEVLHTVRSAEQPLVDNWDCLKSYVKIFEAHCGRLTAYGRKHVIRGSIASIC  
NAGITSEKMAAMSAQAFST

**>SIVPE10**

MIFKYIVCVALVVLSICVNIENGRSVSKFLTEETVGTKWAVLVAGSNGWWNYRHQADVCHAYQLL  
KKGGLKDENIIVFMYDDIANNTMNPRPGVIINNPBGQDVYKGVPKDYVGEDVNAENFFNVILANK  
SGITGGSGKVLNSAPNDHIFIYYVDHGGPGIVSMPTGVVYANDLIDVLKKKHGSGTYSKLVFYLEA  
CESGSMFDGILLPEGLDIYVTTASNPNESSWGTYCGVGDARDPCLVACPPPEFKGVCLGDLYSV  
AWMEDSDVQDRQTETLDDQYDRIANRTAANLTYGSHVMQYGDMVLSVDALFQYMGVASINHS  
HVSMSNSYKSSSQNVEQRETELFWQSKYDNAPEGSDDYFEARAKLINVVAHRSQVDNINVKHIG  
DLLFGVKYGNEALQTVRSSGQPLVDNWDCLKSYVEIFEAHCGKLSYGGKHIRGIANICNAGIER  
EQMTAATVQACGPL

**>SIVPE11**

MISWYNIIVIFLFLVLSIFVNIENGRSISQFLNQESQGTKWAVLVAGSNGWDNYRHQADVCHAYQLL  
KNGGLKDENIIVFMYDDIAHNRENPRPGVIINNPBGNDVYKGVPKDYVGEDVNALNFYNVILANK  
SGIVGGTGVKVLNSGPNDHIFIYYTDHGGPGIVAMPSGELVYANDLVNVLKKKHASGTYDRLVLYL  
EACESGSMFDGILLPEGLDIYVMTASEPNEDSWATYCGEGTPEEPCLVQCSPPEFQGVCLGDLY  
SISWMEDSDIQDRTADSVQGGQYSRWKIRFMFFILRPKVANRTAANITHGSYGSYSHVTEYGDIVVSF  
DSLAAVMGENFKNHSHDSVDAKSFSTSSSRNVDQHSTELFYLFKAKHKAPEGSNEKYEALVKNL  
EVKSQRSQVDYINVKHLGELLFDVEKGNEVLNSVRPARQPLVDNWDCLKSYVKIFEAHCGRLTTY  
GRRHVRGIANICNAGITNEKMOVAMSAQACSS

**>SIVPE12**

MIYRDYIVGVFFLVLSIFVNIENGRSISQFLTQKTKGTKWAVLIAGSAGWTNYRHQADVCHAYQVL  
KAGGLKEENIIVFMYDDIANNTKNPRPGVIINNRQGHVYKGVPKDYVGDVNAKNLNFNVILANK  
SGVVGGSGKVLRSAMPSELIYADELFNMLKKKHASGTYDRLVIYLEACESGSMFDGILPKGLNI  
YAMTASKPDENSFATYCGDGTDPHPCFGPCSLPEFKGICLDLYSVAWMEDRTAANLTYGSHV  
MQYGDLMVSFDPLATYMGENFKNHSDSDVDAKSFSTSSSRNVDQRNSELFYLFTHKHQKALEGS  
DEKYEALVKNLKVKSQRSQVDNINVKHLGELLFGVEKGNEVLNNVRPAGKPLVDNWDCLKSYVKI  
FEAHCGRLTTYGRRHVRGIANICNAEITNEKMOVSMSSQACSS

**>SIVPE13**

MISRCNIVGVFFLVLSIFVNIENGRSISQFLIQKTKGTKWAVLVARNSGWTNYRHQADVCHAYQILK  
AGGLKDENIIVFMYDDIANNTENPKPGAIINNPBGHDVYKGVPKDYVGEDVNANNFYNVLLANKS  
GVIGGSGKVLKSGPNDHIFIYYTDHGAAGFITMPSESIYADDLFNVLKKKHASGMVDRLVLYLEA  
CESGSMFDGIFHKGLNIYAITASKPDENSFGTYCGDGTDPDPCFGQCPPPEFKGVCLGDLFSVA  
WMEDSDVQDRKINSLHGQYSRVAKRTAANLTHHNYGSHVQEYGDKVVVSFDPLAAYMGETSKN  
HSHDSVDAKSFSTLSSRNVDQRSALFYMFTKRSQVDNINVKHLGELLFGVEKGNEVLHTVRRRA  
GQPLVDNWDCLKSYVKIFEAHCGRLTVYGRKHVRSIAKICNAGITSEKMDAMSAQACSS

**>SIVPE14**

MISRYNIVGVFFLVLSIFVNIENGRSISQFLAQKTKGTKWAVLIAGSAGWTNYRHQADVCHAYQILK  
TGGLKDENIIVFMYDDIANNIENPRPGVIINNPBGHDVYKGVPKDYVGEDVNAINLNFNVILANKSG

VVGGSGKVLKSGPNDHIFIYYADHGAPGFISMPSGELIYAHELFNVLKKKHASGTYDRLVIYLEAC  
ESGSMFDGILPKGLNIYAMTASKPDEASFGTYCGNGTSHTPCFGQCSPLEFKGICLDLYSVAW  
MEDRTAANLTYRNYGSHVQEYGDVVVFDPLVAYMGETSKNHSHDSVDAKSFSTSSSRNVDKR  
STELFYLFTHENAPEGSDEKYDALVKLNEVMSHRSQVDNNVKHLGELLFGVEKGNEVLHTVRP  
AGQPLVDNWDCLKSYVKIFEAHCGRLTAYGKKHVRGIANICNAGITSKKMAAMSARACSN
